# Supplementary material for: Evaluating a preoperative protocol that includes magnetic resonance imaging for lymph node metastasis in the Cholangiocarcinoma Screening and Care Program (CASCAP) in Thailand
Source: World J Surg Oncol. 2017 Sep 20;15:176. doi: 10.1186/s12957-017-1246-9 (PMC5607577; doi:10.1186/s12957-017-1246-9)
Supplement: Supplementary file 1 — Dataset 1. (CSV 16 kb) [file 12957_2017_1246_MOESM1_ESM.csv]

n_ptid	n_ptcodeful	f1v3	f2p1v3
1.39174E+12	36267787	2
1.38615E+12	9118855565	1
1.39212E+12	9103455191	1	4
1.39268E+12	9102195259	1
1.39324E+12	1098088916	1
1.39202E+12	1387480237	1	2
1.39151E+12	1382505107	1
1.39523E+12	1383124437	1	2
1.39089E+12	1379172278	1	3
1.39445E+12	1381550605	1	1
1.39505E+12	1378457286	2	2
1.39505E+12	1385815300	1	2
1.39506E+12	1378563679	1	1
1.39506E+12	1383202018	1	2
1.39507E+12	1381214332	1	1
1.39507E+12	1384599540	2	4
1.39506E+12	1384915040	1	1
1.39506E+12	1383241069	2	1
1.39506E+12	1379477646	1	1
1.39507E+12	1381555899	1
1.39513E+12	1382727877	2	1
1.39514E+12	1387061579	2	1
1.3915E+12	1386246206	1	1
1.39151E+12	1378522433	1	2
1.39522E+12	1377936091	1	1
1.39136E+12	1385304759	2	2
1.39598E+12	1386087948	1	1
1.39598E+12	1380439171	1	1
1.39565E+12	1381049459	1	2
1.39598E+12	1385452975	2	3
1.39598E+12	1381370377	2	4
1.39599E+12	1380982363	1	1
1.39214E+12	1387321459	1	1
1.39136E+12	1381764785	1	2
1.39151E+12	1380843628	2	2
1.39598E+12	1382361235	1	2
1.39598E+12	1386047992	1	2
1.39564E+12	1385985023	1	3
1.39582E+12	1384482576	1	1
1.39426E+12	1382671779	1	1
1.39531E+12	1385457615	2	1
1.39598E+12	1381891623	2	3
1.39599E+12	1384212708	1	2
1.39202E+12	1387229604	1	2
1.39599E+12	1381456559	1	2
1.396E+12	1384054421	2	1
1.39387E+12	1382800670	2	1
1.396E+12	1383912557	2	4
1.39572E+12	1380363613	1	1
1.396E+12	1383803889	2	1
1.396E+12	1383751553	1	4
1.39203E+12	1379937556	1	2
1.39151E+12	1384370876	1	1
1.396E+12	1382484520	1
1.39089E+12	1380613247	1	1
1.396E+12	1386059996	1	1
1.396E+12	1378294888	2	1
1.39601E+12	1378339617	1	2
1.3915E+12	1385590569	1	1
1.39539E+12	1069028181	2	2
1.39468E+12	1076851512	2	1
1.39834E+12	1386093027	2	1
1.39326E+12	1381479107	1	1
1.39461E+12	1382065986	2
1.39461E+12	1385904971	2	1
1.39463E+12	1382140798	2	2
1.39955E+12	1382986673		1
1.39592E+12	1385198554	1	4
1.39704E+12	1380766637	1	4
1.39626E+12	1386771682	1	2
1.39548E+12	1384264627	2	1
1.39652E+12	1387400790	2	1
1.40084E+12	9105452645
1.39446E+12	1385732294	2	2
1.39422E+12	1382572969	1
1.39136E+12	1380623907	1	1
1.39525E+12	1378415996	1	1
1.39635E+12	1387632433	1	2
1.39582E+12	1385805594	1	1
1.39445E+12	1379036088	2	1
1.39532E+12	1381796268	2	1
1.40196E+12	1385608291	1	4
1.40196E+12	1384058096		2
1.39151E+12	1387398361	2	1
1.39694E+12	1377905239	1
1.39834E+12	1380124569	2	2
1.3965E+12	1384560683	2	1
1.39151E+12	1382626429	1
1.39694E+12	1383790182	1
1.40324E+12	1237383378	1	1
1.40324E+12	1426733942	2	3
1.40325E+12	1237498876	1	1
1.39599E+12	1385861983	1	2
1.40325E+12	1071642920	1
1.39081E+12	1379697317	1	2
1.396E+12	1378943646	1
1.39599E+12	1385494097	2	1
1.39471E+12	1105120005	1
1.39471E+12	1107753561	1	3
1.39285E+12	1101222126	1	1
1.4037E+12	1386322374		4
1.39954E+12	1385367427	1	1
1.39522E+12	1382197989	2	1
1.39807E+12	388350805	1	2
1.3953E+12	1379058196	2	2
1.38995E+12	1235931094	2
1.40376E+12	1235769620	2	1
1.40378E+12	1234160194	1	1
1.39333E+12	1072620023	2
1.39637E+12	1386644303	2
1.39966E+12	1386277689	1	2
1.39608E+12	1381331081	1	2
1.39634E+12	1378591701	1	2
1.39591E+12	1387018881	2	2
1.40369E+12	1382081877	1
1.3971E+12	1380352933	2	1
1.39908E+12	391505154	1	1
1.3953E+12	1381980438	1	2
1.40032E+12	1382340015	1	1
1.4041E+12	1234337027	2	1
1.4042E+12	1234168763	1	1
1.40428E+12	1236971935	1	1
1.39055E+12	1070089651	1	1
1.40471E+12	1234158928	1	1
1.40367E+12	1232150410	1	1
1.40367E+12	1236648227	1	2
1.40473E+12	1232993640	2	1
1.40652E+12	1229411440	2	1
1.40661E+12	1385968181	2	1
1.40662E+12	1386806867	1	1
1.4023E+12	1378862064	1	1
1.40609E+12	1378894077	2	2
1.39711E+12	1379212079	2	3
1.40048E+12	1378122655	1	1
1.39704E+12	1384966441	1	2
1.39945E+12	1379695362	1	2
1.40688E+12	1229786189	2
1.40731E+12	1381504835	2	1
1.41217E+12	1068109749	2
1.40549E+12	1228183559	1	1
1.40489E+12	1382162643	1
1.40367E+12	1231071546	1	1
1.39992E+12	1380415278	1	1
1.4023E+12	1384748208	1	2
1.40169E+12	1384788038	1
1.40741E+12	1384093625	2	1
1.40626E+12	1381807517	1	1
1.40853E+12	1380115243	1	2
1.40488E+12	1381915772	1	1
1.40256E+12	1378735298	1	1
1.40421E+12	1385669904	2	1
1.40514E+12	1383775199	2	2
1.40083E+12	1386436266	2	4
1.40196E+12	1386693570	2	2
1.4036E+12	9141761	2	1
1.4036E+12	9021772	2	1
1.40307E+12	1379902733	1	1
1.39176E+12	1071348853	1	0
1.40619E+12	455266232	1
1.41018E+12	1235547041	2	0
1.39418E+12	571783560	2	4
1.39866E+12	1379368486	2	4
1.39582E+12	469722564	1
1.40688E+12	1232587286	1	1
1.40126E+12	462288166	1
1.40437E+12	1234277195	1	1
1.39652E+12	463742377	1
1.39329E+12	469972271	1	4
1.41231E+12	1231524388	1	1
1.39482E+12	445779637	1	1
1.40954E+12	1232122317	1	1
1.40101E+12	476128664	1
1.39151E+12	1381292394	1	1
1.3915E+12	1385780200	1	1
1.4136E+12	1380135856	1	2
1.39235E+12	438761713	1	1
1.39695E+12	462865424	1
1.41197E+12	1229738578	1	1
1.40689E+12	1073671346	1	1
1.3909E+12	1379622980	1	2
1.39089E+12	1384769836	1	4
1.41138E+12	1387548470	1	2
1.3909E+12	1384860295	1	4
1.39089E+12	1379999039	1	2
1.41018E+12	1386829080	1	3
1.41476E+12	1383732705	2	1
1.40169E+12	1385748311	2	2
1.40514E+12	1381232370	1	2
1.40985E+12	1378061170	1	2
1.4055E+12	1381621699	1	1
1.40653E+12	1384995860	2	1
1.40294E+12	1386353575	1	1
1.40005E+12	1381756226	1	2
1.39136E+12	1384697071	1	4
1.39522E+12	1379785355	2	2
1.39151E+12	1383086389	2	2
1.39151E+12	1382699407	2	2
1.39419E+12	1380162700	2	1
1.39636E+12	1387659118	1	2
1.39646E+12	1385855683	2	2
1.39653E+12	1382280366	1	2
1.39948E+12	1380880939	1	1
1.41052E+12	1381173524	1	1
1.40429E+12	1383482256	2	1
1.40111E+12	1385675288	2	4
1.4041E+12	1382115223	2	2
1.41319E+12	1378303758	1	1
1.40792E+12	1383801693	1	4
1.41337E+12	1067976671	1	2
1.39539E+12	1068607523	2
1.40897E+12	1387395219	1	2
1.41016E+12	1379348150	1	2
1.40723E+12	1380656393	1	1
1.40731E+12	1385844297	1	1
1.41016E+12	1382758523	1	2
1.41017E+12	1383834897	1
1.39522E+12	1378509315
1.41162E+12	1385692986	1	2
1.40475E+12	1383358988	1	1
1.40723E+12	1381338182	1	2
1.41345E+12	1067128998	2	1
1.40594E+12	1380469647	2	3
1.39972E+12	1385339938	2	4
1.40835E+12	1384974778	2	2
1.4145E+12	1380389037	2
1.41207E+12	1384611536	1	2
1.40266E+12	1383869811	1	1
1.4081E+12	1384225915	1
1.41172E+12	1377967841	1	4
1.40549E+12	1379477832	1	2
1.4055E+12	1378608500	1	4
1.41053E+12	1386285083	1	1
1.41198E+12	1379489661	2	4
1.41199E+12	1378499717	1	1
1.40965E+12	1384257972	1	1
1.41161E+12	1384497833	1	2
1.40861E+12	1385484655	1	2
1.41318E+12	1385250558	1	2
1.41458E+12	1068114699	1
1.41743E+12	1233419390	1	1
1.4036E+12	1233604119	1
1.41217E+12	1067097983	1	2
1.4072E+12	1381033847	1	4
1.40385E+12	496809553	1	1
1.40602E+12	1387470927	2
1.40471E+12	1381023680	2
1.40471E+12	1381733116	2	1
1.41709E+12	1235253465	1	2
1.41839E+12	1076633276	1	3
1.41811E+12	1074650909	1	1
1.4158E+12	1069498540	1	1
1.40476E+12	1385314836	2	2
1.41146E+12	1383125334	1
1.41386E+12	1386955757		3
1.4138E+12	1069970609	2
1.40428E+12	1382985850	1	2
1.4157E+12	1383814039	1	1
1.41389E+12	1380398269	2
1.41223E+12	1385767416	1
1.41456E+12	1381362525	2
1.41305E+12	1383887500	1
1.41379E+12	1379855580	1
1.41624E+12	1385967324	2	1
1.41319E+12	1385054663	2
1.41337E+12	1379388307	1
1.41838E+12	1070304082	1	1
1.41838E+12	1074005871	1	1
1.41354E+12	1231998176	2	1
1.41759E+12	1075316975	2	1
1.41881E+12	1068019166	1
1.38053E+12	1103919077	1
1.41699E+12	1075888580	2
1.41751E+12	1068215272	1	1
1.41217E+12	1075734701	1	1
1.39523E+12	1386635537	1	2
1.39515E+12	1383400837	2	1
1.39351E+12	1386334646	1	4
1.396E+12	1378535418	1	1
1.3946E+12	1379685072	2	1
1.39445E+12	1380012822	2
1.39599E+12	1383970910	2	4
1.39151E+12	1384658158	2	2
1.39599E+12	1385428901	1	4
1.39136E+12	1382475640	2	1
1.40005E+12	1384081649	2	4
1.39965E+12	1381916605	1	3
1.3956E+12	1378811375	2	2
1.39966E+12	1381045315	1	4
1.39419E+12	1383250242	1	1
1.39954E+12	1383851812		1
1.40247E+12	1381408055	1	1
1.39966E+12	1385513654	1	3
1.40066E+12	1386595937	1	4
1.39693E+12	1379232556	2
1.39695E+12	1380758826	1
1.39344E+12	1380205023	2	2
1.39583E+12	1384357662	2	2
1.39573E+12	1380880750	2	1
1.39599E+12	1384261681	1
1.396E+12	1385523469	1	1
1.396E+12	1379400721	2	4
1.39598E+12	1385826879	2	4
1.396E+12	1379119004	2	4
1.39598E+12	1378564514	1	1
1.40368E+12	1230243390	1
1.41198E+12	1234832814	2	1
1.41624E+12	1381317324	1	1
1.41464E+12	1383313595	1
1.41863E+12	1386898656	2	1
1.39598E+12	1384598826	1	2
1.41681E+12	1379761880	1
1.42053E+12	1383162764	2	1
1.41868E+12	1378492545	1
1.41929E+12	1378530752	2
1.41773E+12	1379519373	2
1.42058E+12	1382023902	1	2
1.41638E+12	1379489609	1	2
1.39523E+12	1382186051	1	2
1.39515E+12	1387217101	1
1.3952E+12	1385974127	2	4
1.3952E+12	1381039270	1
1.3952E+12	1378520355	1	2
1.39521E+12	1381356723	2	2
1.3952E+12	1385412515	1	2
1.39521E+12	1380746559	1
1.39601E+12	1378418320
1.39598E+12	1384948868	2	4
1.39598E+12	1378722739	2
1.39598E+12	1379946693	1	4
1.40073E+12	1384764279	1	4
1.41579E+12	1072872818	2
1.40057E+12	1383701367	1	1
1.40049E+12	1386893045	2	4
1.40195E+12	1384127473	1	4
1.39635E+12	1381880686	1	1
1.4037E+12	1384102972	1	3
1.41319E+12	1383862434	1
1.41967E+12	1380173116	1
1.41933E+12	1383629450	1
1.41474E+12	1385040242	1
1.4181E+12	1385769746	2
1.41932E+12	1385215613	2
1.41743E+12	1387594193	2
1.41872E+12	1071259497	1	2
1.41932E+12	1068885339	1
1.422E+12	456678534	1
1.42061E+12	1229708998	1	1
1.42061E+12	1237241822	1	1
1.42062E+12	1230662487	2	4
1.42166E+12	1231263208	1	1
1.42193E+12	1229107284	1
1.42192E+12	1236825082	1
1.42069E+12	1232639029	1	1
1.41717E+12	1232955736	2
1.42192E+12	1235991713	1
1.41716E+12	1230095495	1	1
1.41628E+12	1230072560	1	1
1.41136E+12	1232299971	1	1
1.41136E+12	1232298188	1
1.41354E+12	1234395580	1	1
1.42225E+12	1069646808	1	1
1.42416E+12	1067169186	1
1.42166E+12	1075950064	1	1
1.41136E+12	1231438283	2	1
1.42234E+12	1069112038	1	1
1.40679E+12	461571939	1	1
1.40912E+12	1237494661	1	1
1.40913E+12	1229377045	1	1
1.41034E+12	1235157666	1	0
1.42357E+12	1383424973	2
1.42314E+12	1381040227	1
1.41561E+12	1379505001	1	1
1.41449E+12	1385590785	1
1.4213E+12	1386508426	2	2
1.41379E+12	1385464409	1
1.41638E+12	1385048534	2
1.40913E+12	1233797147	2	0
1.41621E+12	1381154380	2
1.42234E+12	1382964684	2	1
1.41499E+12	1380828609	1
1.4144E+12	1381202351	1
1.42183E+12	1382646529	1	4
1.42051E+12	1380188964	1	2
1.41993E+12	1384052390	1	1
1.42051E+12	1386404305	1
1.41578E+12	1387216461	1
1.41941E+12	1381120395	1
1.41929E+12	1378098438	1
1.41682E+12	1384791890	2
1.41444E+12	1385226159	1
1.42334E+12	1383227870	2
1.41284E+12	1069061579	2
1.42487E+12	512165109	2
1.40593E+12	1236398389	2	1
1.40593E+12	1231476244	2	1
1.40911E+12	1228183783	1	1
1.40912E+12	1229451530	1	1
1.42441E+12	1381533883	1
1.42495E+12	1235246832	2
1.41715E+12	1228712709	1	1
1.42494E+12	1237469484	1	1
1.42415E+12	1233753908	2	1
1.42415E+12	1231823216	2	1
1.42287E+12	1232738501	2	1
1.40913E+12	1235098923	1	0
1.40421E+12	1230873785	1	1
1.40317E+12	1381085025	1	2
1.39234E+12	9983755875	2
1.41033E+12	1236485467	1	1
1.41136E+12	1228666385	1
1.41077E+12	1379054718	2
1.41017E+12	1384763223	1
1.40363E+12	1102013030	1
1.4067E+12	1384489458	2	2
1.41146E+12	1383181735	1
1.42486E+12	1073634792	1	1
1.42483E+12	1067357951	2	1
1.41033E+12	1237425028	1	1
1.42355E+12	1231398199	1	1
1.41716E+12	1236581441	2	1
1.40325E+12	1235293450	2
1.4269E+12	460164235	2
1.40912E+12	1228144543	2	1
1.39343E+12	1070586529	1	1
1.39358E+12	1075683538	1	1
1.42564E+12	1383184513	2
1.41477E+12	1380347529	1
1.42304E+12	1377894460	2
1.42364E+12	1378563012	1
1.41924E+12	1380799728	1
1.42238E+12	1383266454	1
1.42245E+12	1380924513	1	2
1.39598E+12	1380020445		3
1.39515E+12	1385676881	1	4
1.40595E+12	1386349698	2	4
1.40601E+12	1380309318	2	4
1.39823E+12	1378392378	1	1
1.40412E+12	1379915610	1	4
1.40187E+12	1380644166	2	4
1.40178E+12	1383523438	1	4
1.39626E+12	1383333248	1	1
1.39618E+12	1384787950	1	1
1.40654E+12	1383047182	2	1
1.41016E+12	1382689468	1
1.40808E+12	1379226572	2	1
1.40896E+12	1382475266	2	2
1.42317E+12	1379791207	1
1.39442E+12	1073837038	1	3
1.40059E+12	1070571908	1	2
1.39661E+12	1073684996	1	1
1.39661E+12	1068840933	1	1
1.39566E+12	1067206323	2	2
1.39514E+12	1071481703	2	3
1.39281E+12	1073399053	2	1
1.42124E+12	1076088607	2	1
1.42124E+12	1070163097	2	1
1.41653E+12	1075832897	1	1
1.41207E+12	1386891193	1
1.42419E+12	1379634203	2
1.42334E+12	1377816627	2
1.42605E+12	1072719083	2	1
1.42466E+12	1380394845	1
1.42183E+12	1378043604	1	2
1.40593E+12	1383201181	1
1.42608E+12	1073825458	1
1.41577E+12	1383822737	1
1.4205E+12	1383016133	1	2
1.42666E+12	1385074946	1
1.42759E+12	1384955627	2
1.42086E+12	1383008542	1	1
1.42771E+12	1379921116	1
1.41924E+12	1073650468	1
1.39601E+12	1385168636	1	2
1.3961E+12	1379978573	2	1
1.39824E+12	1379747448	1	1
1.40904E+12	1384102570	1
1.39453E+12	1095304042	1	4
1.41768E+12	1076115614	1
1.42484E+12	1228631667	2	4
1.42669E+12	1427927952	1	4
1.42779E+12	1427741695	1
1.39652E+12	1378652122	1	2
1.40006E+12	1383602210	2	1
1.39651E+12	1380937691	2
1.39652E+12	1384001739	1	2
1.39652E+12	1386626393	2	1
1.39653E+12	1383656379	2	1
1.39653E+12	1386443007	2	3
1.39653E+12	1385038991	2	1
1.39828E+12	1380887355	1	2
1.39885E+12	1385950505	1	2
1.39904E+12	1382109872	2	1
1.40015E+12	1385912474	1	4
1.40073E+12	1381587673	1	1
1.40109E+12	1386492408	2	2
1.4011E+12	1378573502	1	1
1.40125E+12	1378893584	1	3
1.40169E+12	1380812532	1	1
1.40195E+12	1383353509	1
1.40247E+12	1386713694	2
1.40248E+12	1378580296	1	1
1.40308E+12	1381475581	2	2
1.39136E+12	1386274023	2	3
1.3915E+12	1381624541	1	4
1.39202E+12	1378477097	2	4
1.39231E+12	1382275826	1	1
1.39232E+12	1383167643	1	1
1.3932E+12	1386473886	2	1
1.40324E+12	1378750842	1	4
1.40352E+12	1384352744	1	2
1.40428E+12	1383592722	1	2
1.40429E+12	1379366950	1	1
1.40595E+12	1381760327	2
1.39324E+12	1384268142	2	1
1.39351E+12	1382746299	2
1.39393E+12	1387572350	1	1
1.39463E+12	1387404763	1	1
1.39522E+12	1378643872	1	1
1.39404E+12	1386850423	1	1
1.3953E+12	1382338456	2	1
1.39531E+12	1384023527	1
1.39582E+12	1378692861	1	1
1.39598E+12	1383076788	1	1
1.3961E+12	1377815515	2
1.3961E+12	1377766154	1	2
1.40662E+12	1379378546	1	4
1.40731E+12	1385977245	1	1
1.40861E+12	1381377976	1	1
1.40914E+12	1378395223	2
1.41034E+12	1385823885	1
1.41094E+12	1381402817	1
1.41207E+12	1386820385	1	1
1.41327E+12	1378962109	1
1.41337E+12	1386352167	1
1.4144E+12	1380615228	1
1.41456E+12	1383309144	1
1.41465E+12	1381766388	2
1.41474E+12	1381372465	2
1.41682E+12	1382791754	2
1.41699E+12	1384734167	2
1.42563E+12	1378877766	2
1.39351E+12	1379282480	1	4
1.41803E+12	1075693063	1	1
1.40601E+12	1381837988	1	4
1.42718E+12	1387030950	1
1.42528E+12	1380406181	1
1.42948E+12	1378944628	1
1.42916E+12	1383629175	2
1.43098E+12	1378006375	1
1.39419E+12	1382441975	2	1
1.42925E+12	1382304784	1
1.42918E+12	1076155471	1
1.40732E+12	1386885459	1
1.40169E+12	1377855960	1
1.40602E+12	1383034113	1	2
1.39964E+12	1377877212	1
1.39966E+12	1379873299	1	2
1.39946E+12	1378934252	1	2
1.39828E+12	1378985829	2	1
1.39827E+12	1384271269	1	1
1.39653E+12	1381983326	1	2
1.39652E+12	1383066631		1
1.39653E+12	1382927398	2	1
1.39642E+12	1381819123	1	1
1.39619E+12	1386400139	2	1
1.39824E+12	1380634977	1	1
1.39619E+12	1384570920	2	1
1.42233E+12	1070298196	2	4
1.42553E+12	1074115427	2	3
1.42553E+12	1074835932	1	3
1.42683E+12	1070096771	2	2
1.41474E+12	333367881	2	1
1.42433E+12	1101820963	2	1
1.42622E+12	1073048780	1	1
1.43219E+12	1232423181	1	1
1.39704E+12	1379325218	1	4
1.42654E+12	1385166256	2
1.43028E+12	1380858000	2
1.42237E+12	1384327275	1	1
1.39603E+12	1379823822	1	2
1.42238E+12	1378720257	1
1.42313E+12	1384205801	1
1.42424E+12	1379638225	1
1.42529E+12	1379889250	1
1.42649E+12	1382985196	1
1.39619E+12	1386127039		3
1.39905E+12	1384465965	1	1
1.39957E+12	1387178502	1	1
1.40188E+12	1382707666	1	2
1.42372E+12	1074663887	1	1
1.40732E+12	1386589381	2	1
1.39151E+12	1387561961	2	1
1.39217E+12	1382862777	2	1
1.39583E+12	1380613308	1	2
1.39601E+12	1386113395	2	4
1.39608E+12	1383864178	1	4
1.39608E+12	1385369510	1	4
1.3961E+12	1386854888	1	1
1.40861E+12	1387149199		1
1.4302E+12	1384343887	1
1.40247E+12	1384967554	1
1.43022E+12	1386279787	1
1.43132E+12	1384065039	2
1.43254E+12	1384974815	2
1.43497E+12	354257310
1.43271E+12	1380500201	1
1.42529E+12	1383396366	1
1.42528E+12	1384528354	1
1.43271E+12	1384429092	2
1.43194E+12	1385752896	1
1.43133E+12	1379199556	1
1.43056E+12	1386846966	1
1.42477E+12	500361679	1
1.43584E+12	1103640820
1.43442E+12	1383992186
1.43202E+12	1379678165	1
1.42795E+12	1382875285	1
1.43193E+12	1384987883	2
1.42493E+12	1378104995	1
1.42607E+12	1426413267	2	4
1.42468E+12	1074481474	2
